## CALCAREA Class Calcaronea Subclass

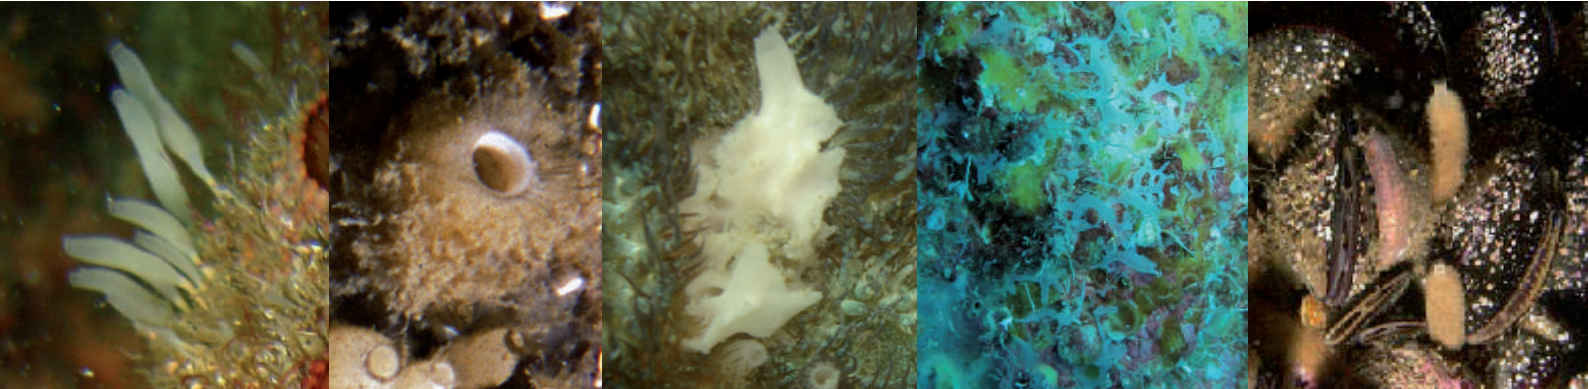

**Amphoriscus sp. nov.**  
vase, friable, oscules 2 mm

**Leucandra rudifera**  
vase, crowned, oscules 3 mm

**Leucilla sp. nov.**  
massive amorphous, friable, oscules 5 mm

**Leucosolenia sp.**  
tubes protruding from a stolon not anastomosing, oscules 1 mm

**Sycon sp. nov.**  
vase, friable, oscules 1-2 mm

## Calcinea Subclass

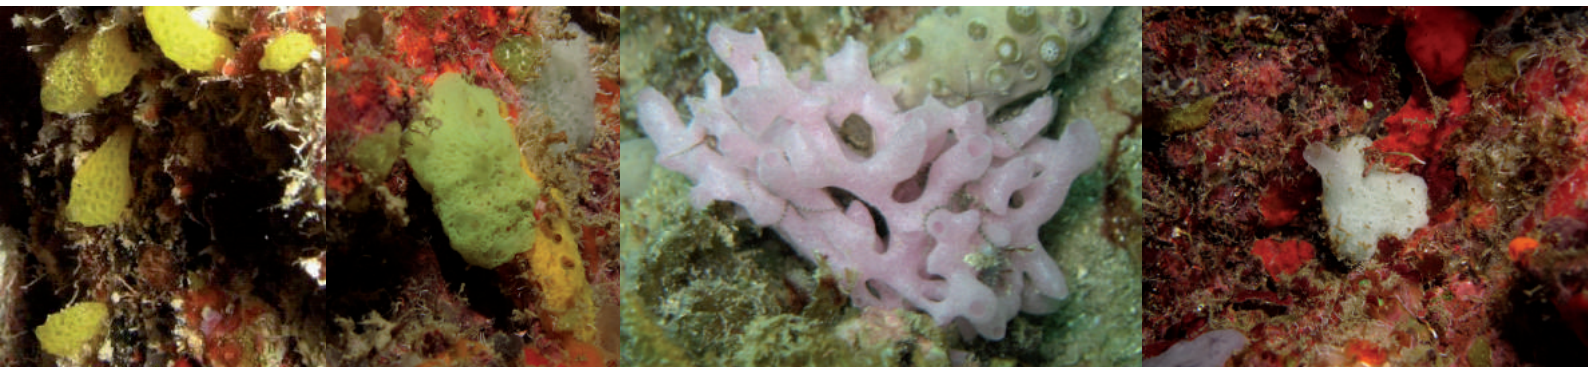

**Clathrina sp. nov.**  
tubular anastomosed, yellow, soft, 1-2 cm wide

**Clathrina sp. nov.**  
tubular anastomosed, light yellow, soft, 1-3 cm wide

**Leucaltis clathria**  
tubular, white to pink, friable, tubes 4-6 mm wide

**Leucetta floridana**  
massive, white to blue, friable, oscules 1-4 cm

## HOMOSCLEROMORPHA Class

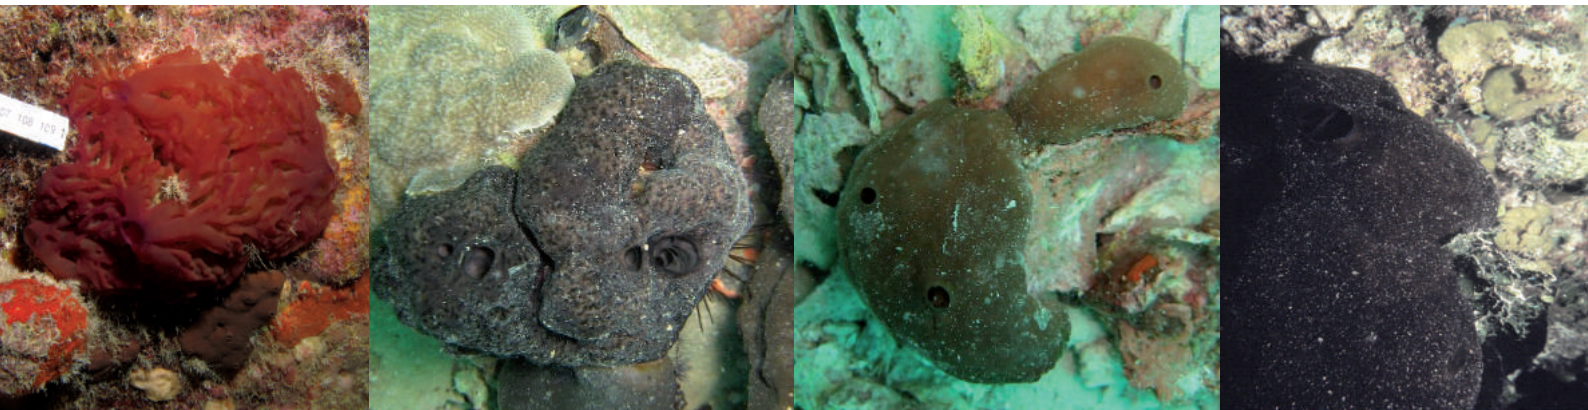

**Oscarella sp.**  
thin crust, lobate, oscules 0.5-1 cm

**Plakinastrella onkodes**  
massive to tubular, gray brown to black, hard, oscules 1-2 cm

**Plakortis angulospiculatus**  
smooth and dense, brown to gray, oscules < 1 cm

**Plakortis halichondrioides**  
smooth, dark brown to black, dark exudate

## DEMOSPONGIAE Class Agelasida Order

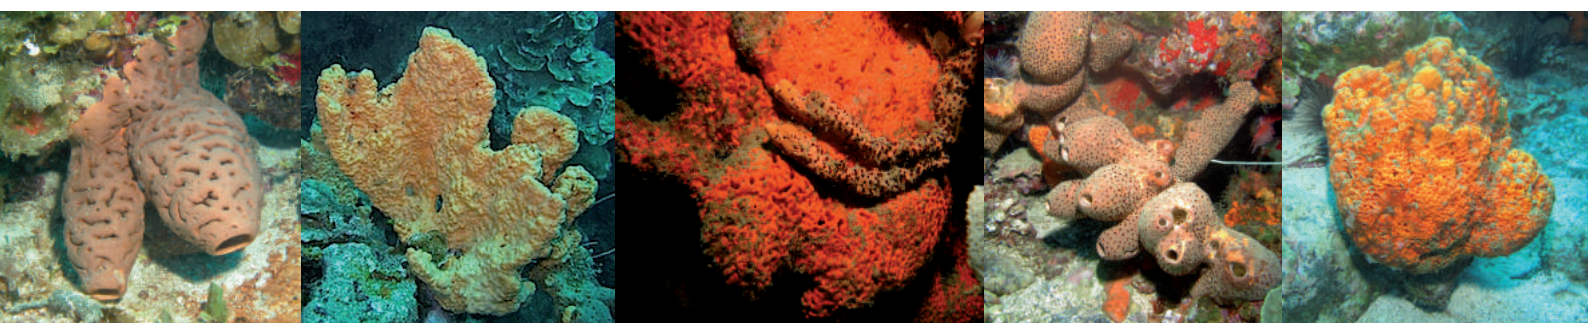

**Agelas cerebrum**  
brown, grooved barrel-tubes (5-15 cm wide, 20-40 cm long), oscules on top of tubes

**Agelas citrina**  
ear-shaped, golden brown to orange, sparse round oscules 3-5 mm

**Agelas clathrodes**  
orange and flabellate (back) diverse oscules  
**A. sceptrum** erect branches (front) oscules 2-3 mm with round membrane

**Agelas conifera**  
orange brown, smooth tubes (5-15 cm wide, 30-60 cm long), oscules on top of tubes

**Agelas dispar**  
brown sephia flabellate or massive, round oscules 2-4 mm, larger key hole deformed openings

Axinellida Order

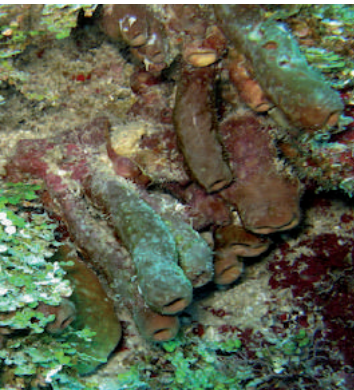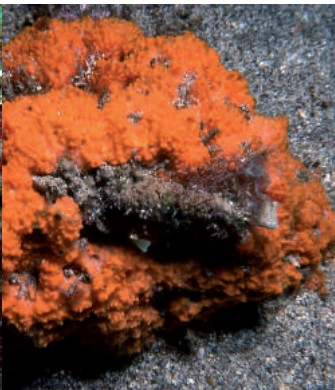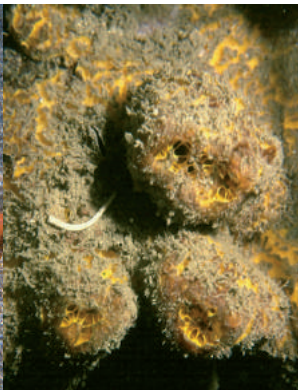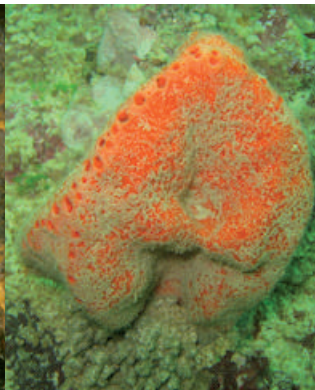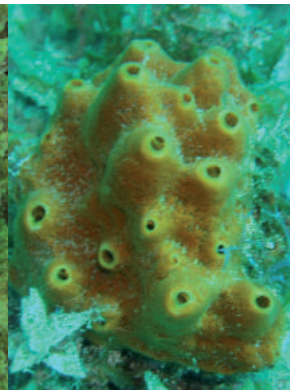

**Agelas wiedenmayeri**

cluster of tubes 2-3 cm wide 6-20 cm long, oscules on top and on side of tubes, round to key-holed

**Prosuberites laughlini**

crustose, orange, rugose surface, oscules 1-6 mm with membrane

**Didiscus oxeata**

massive clumps, yellow-gray, meandering grooves at surface 1-5 mm wide

**Dragnacidon reticulatum**

red thick crusts to mounds, conulose (5 mm), oscules 3-6 mm wide

**Ectyoplasia ferox**

brown-orange massive to lobate, oscules 2-10 mm, with brown rim and slightly elevated

Chondrillida Order

Chondrosiida Order

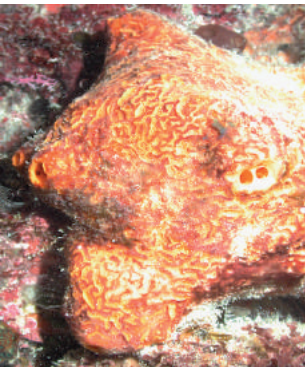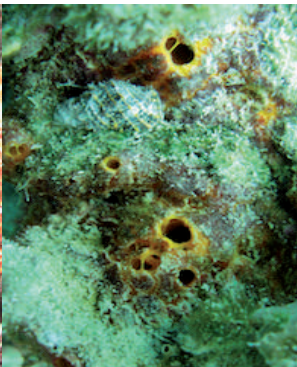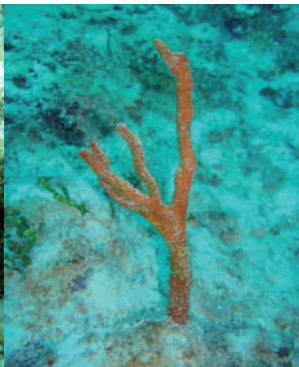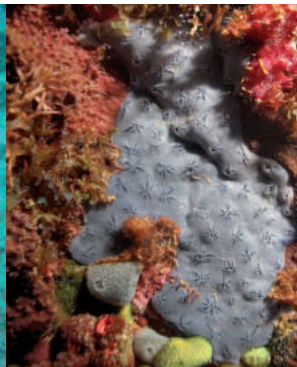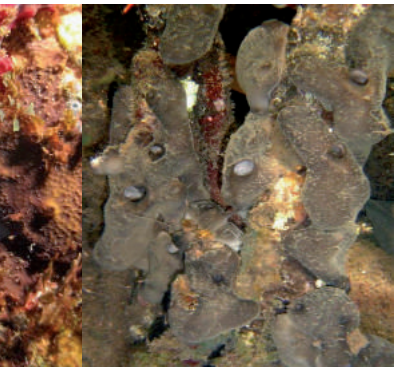

**Myrmekioderma gyroderma**

massive lobate, orange-yellow, meandering grooves at surface, oscules 1-2 cm

**Myrmekioderma rea**

crust filling crevices, orange-yellow, circular grooves at surface, oscules 1-3 cm

**Ptilocaulis walpersii**

erect thin (1-3 cm) branches, orange red, surface with spatulate projections

**Halisarca caerulea**

thin smooth and slippery crust, star-shaped oscules 2-3 mm

**Chondrosia cf. collectrix**

brown to black, massive to crust, cartilage consistency, oscules 1-4 mm wide

Clionaida Order

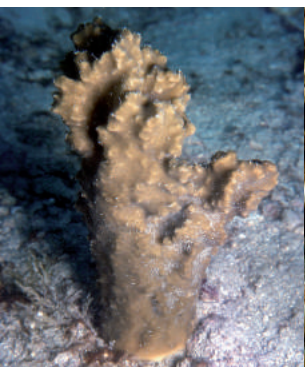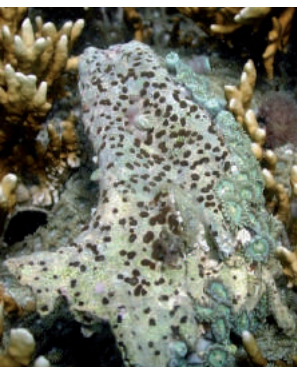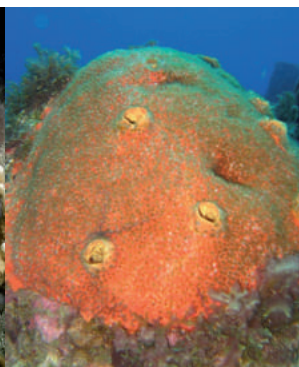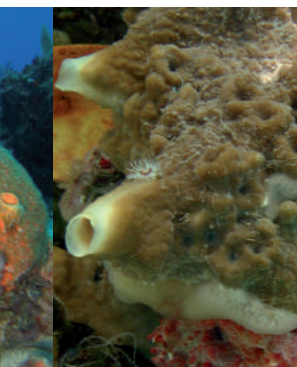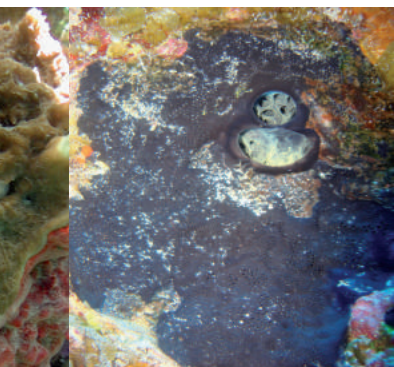

**Cervicornia cuspidifera**

antler like, hollow, deformed tips, cream-brown, tough

**Cliona aprica**

dark brown, small papilla 1-3 mm wide, sponge tissue within coral frame

**Cliona delitrix**

crustose, boring, orange to red, round papilla 2-5 mm, oscules with membrane (1-3 cm wide)

**Cliona varians**

crust to massive, brown greenish, brown membranaceous oscules 2-30 mm wide

**Spheciospongia vesparium**

black, leathery crust to globular, large oscules 1-5 cm

Dictyoceratida Order

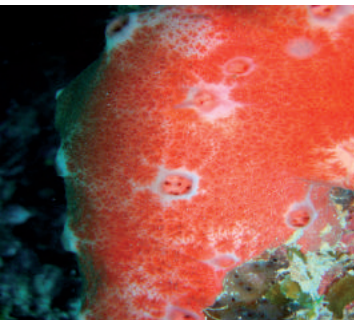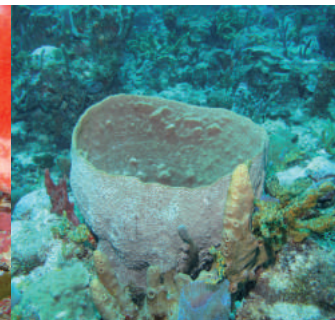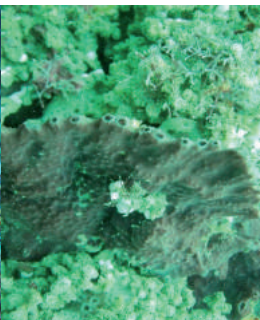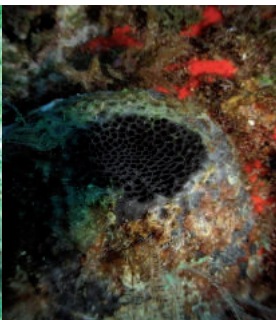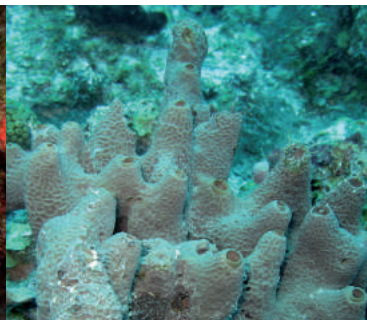

**Spirastrella hartmani**

rustose, salmon to dull orange, membranaceous whitish oscules 5-20 mm wide

**Ircinia campana**

thin walled vase, oscules 1-5 mm, inner side, difficult to tear

**Ircinia felix**

variable shape amorphous to turret shaped, conules 1-2 mm, oscules 4-8 mm

**Ircinia strobilina**

massive, globular, conules 5 mm high, oscules 2-15 mm, aggregated on top

**Smenospongia aurea**

massive-lobate, yellow to brown, honey-combed surface, soft-firm, mucosy when cut

## Haplosclerida Order

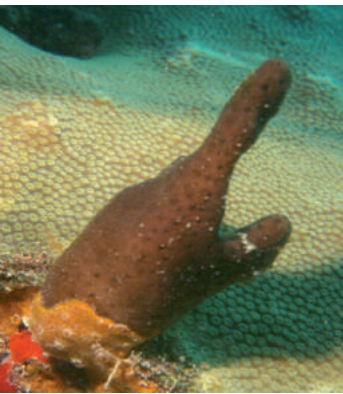

***Amphimedon complanata***  
massive to flabelliform, dark brown-purple to black, oscules 1-3 mm wide

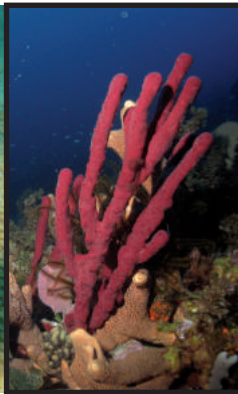

***Amphimedon compressa***  
red ramose to flabelliform or massive, oscules 2-8 mm wide

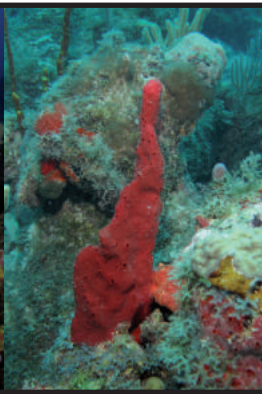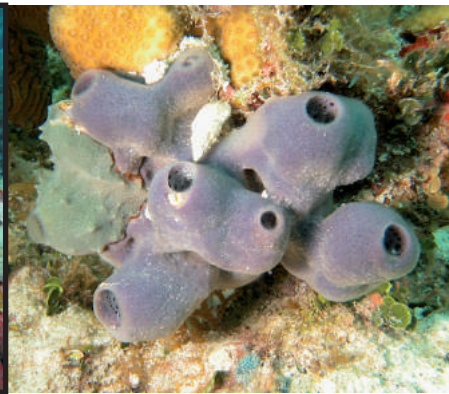

***Callyspongia fallax***  
short tubes to branches (3-4 cm wide), cream-gray to purplish, smooth, oscules 1-2 cm wide

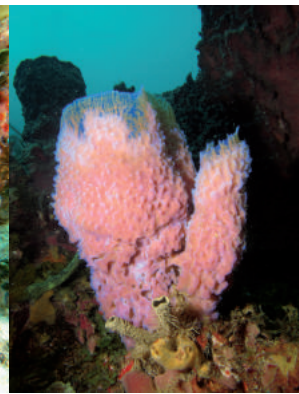

***Callyspongia plicifera***  
vase, outer surface with meandering grooves, iridescent pink, bluish, oscules 1-3 mm

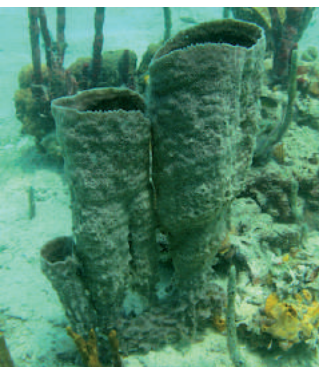

***Callyspongia vaginalis***  
gray to pinkish, vase or tubes with 5-10 mm thick walls, conules 3 mm high, 5 mm apart

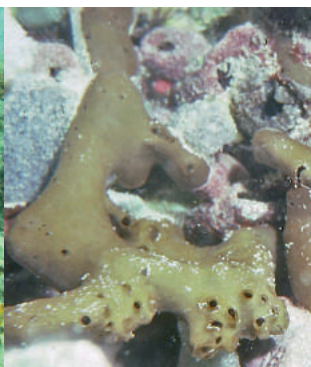

***Calyx podatypa***  
fragile, hollow massive to branching, smooth, riddled by apertures < 1 cm wide

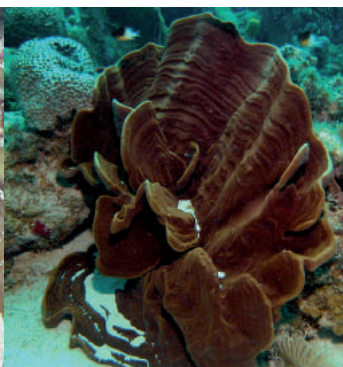

***Cribrochalina vasculum***  
single to anastomosing plates, 1-2 cm thick, velvety surface, reddish brown

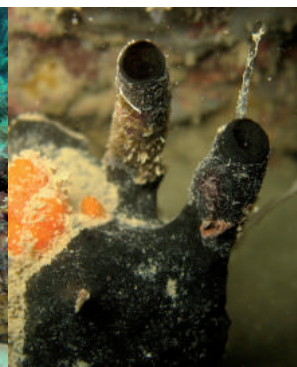

***Neopetrosia carbonaria***  
repent branches to massive, hard, black and hollow, oscules 3-6 mm wide

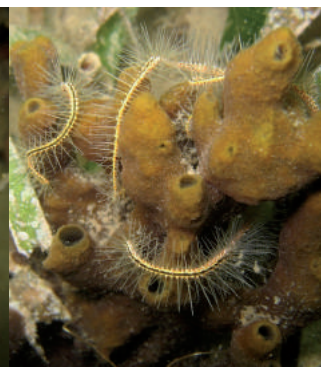

***Neopetrosia proxima***  
massive, lobate, thick crust, brown to burgundy, oscules 3-10 mm

## Poecilosclerida Order

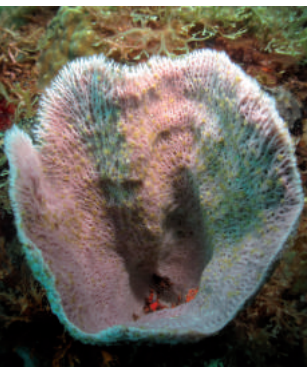

***Niphates digitalis***  
gray, pink to purplish, oscules inner wall, hispid surface between conules (1-3 mm high)

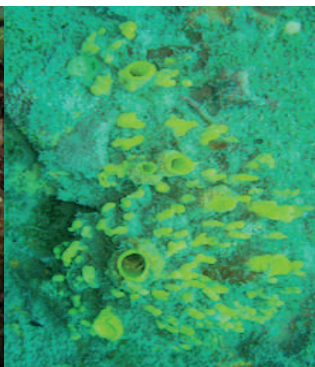

***Spongosorites coralliophaga***  
excavating, yellow, oscular tubes 1-3 cm wide

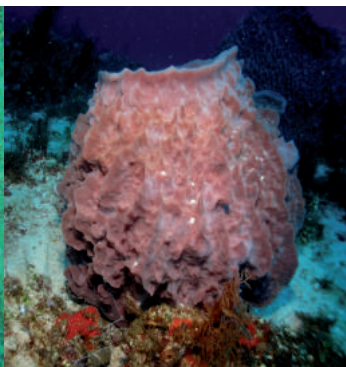

***Xestospongia muta***  
barrel sponge, red to burgundy, oscules 1-3 mm on inner wall

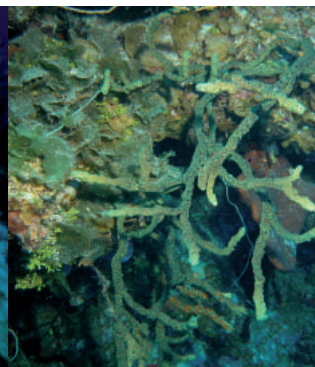

***Iotrochota birotulata***  
sprawling branches, dark green to black, spiky, oscules 1-3 mm

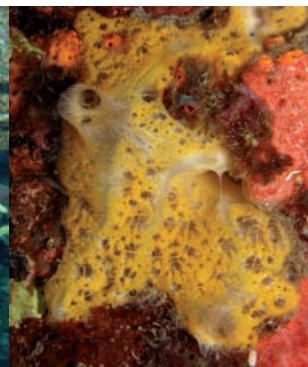

***Mycale laevis***  
thick crust to branching, orange to white, oscules 1-4 cm with white strands on membrane

## Polymastiida Order

## Scopalinida Order

## Suberitida Order

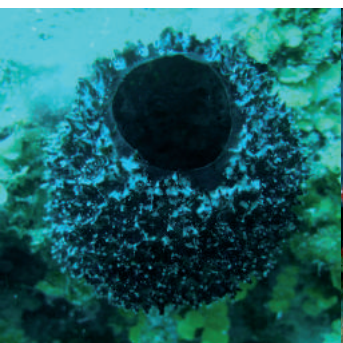

***Mycale laxissima***  
tubular to globular, dark red to black, wall 1-2 cm, spiky pseudo-oscule 3-6 cm

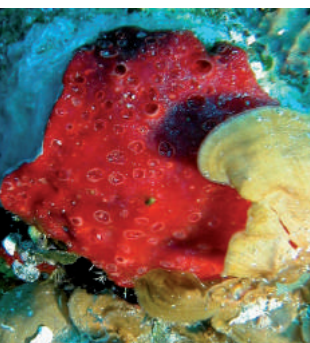

***Phorbos amaranthus***  
bright red crust, areolated surface, oscules 5-20 mm

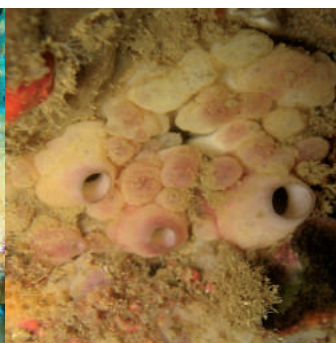

***Polymastia tenax***  
brown to red-brown mounds with papilla, oscular chimneys (5-30 mm wide, 10-20 mm high)

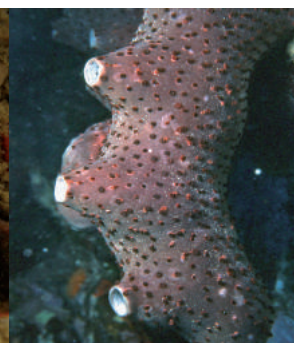

***Svenzea zeai***  
massive to ramose, velvety, soft, oscules 1-2 cm wide

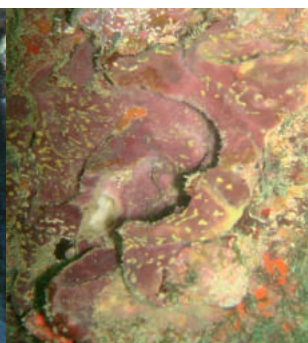

***Topsentia ophiraphidites***  
massive to platy, hard, smooth-velvety surface, red-brown to white

Tetractinellida Order

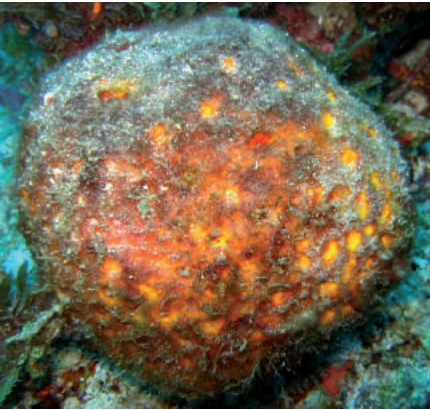

***Cinachyrella kuekenthali***  
round, up to 20 cm wide, orange redish to gray, porocalices 5 mm

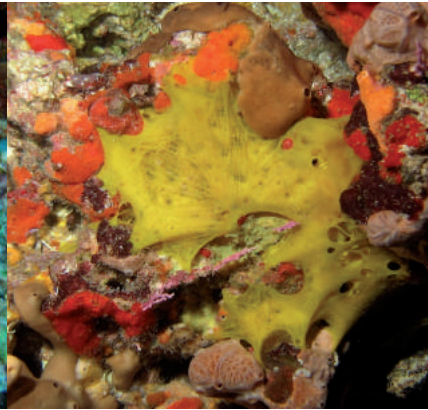

***Dercitus luteus***  
thin yellow crust, smooth and leathery

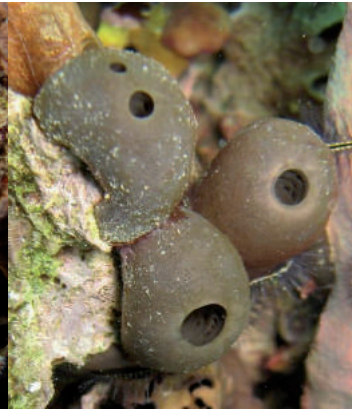

***Erylus formosus***  
massive cushions, brown to black, smooth, oscules 1-10 mm

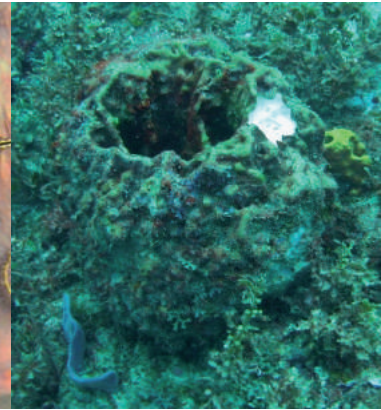

***Geodia neptuni***  
massive to globular, greenish brown, rugose and hard, oscules on top plate few mm wide

Verongiida Order

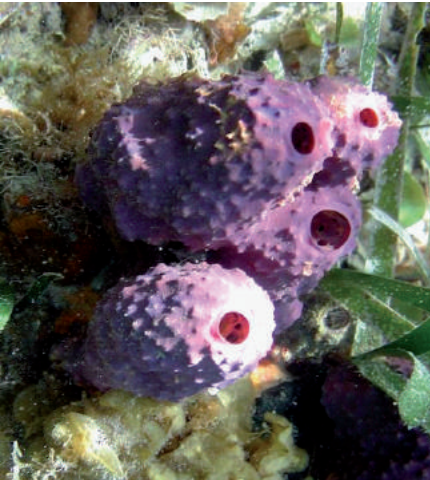

***Aiolochoiria crassa***  
bright yellow to purple, lobes or masses, round conules, oscules 1-2 cm

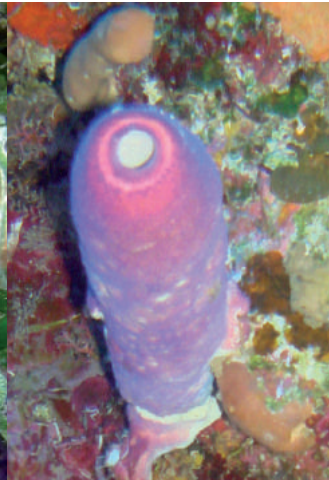

***Aplysina archeri***  
purple to violet tubes, micro-conulose (< 1 mm high), firm

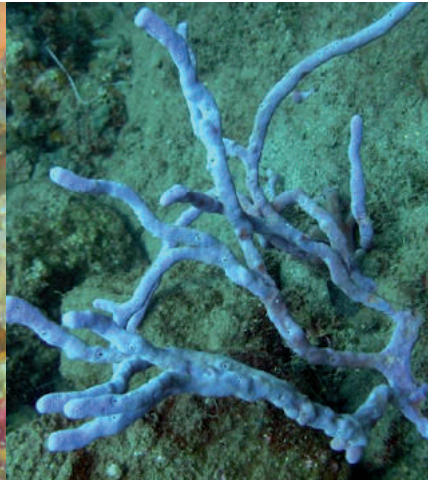

***Aplysina cauliformis***  
pink to purple-brown, branches, conules 0.1 mm high

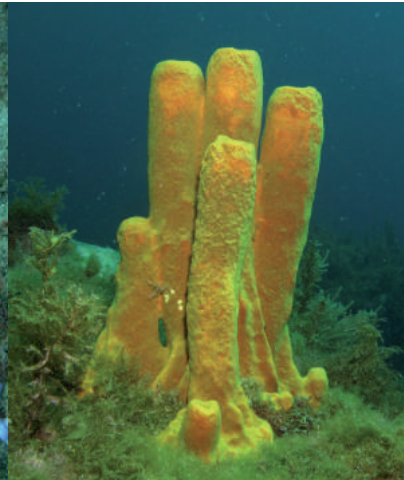

***Aplysina fistularis***  
yellow tubes, > 10 cm high, 2-8 cm wide, conules 5 mm

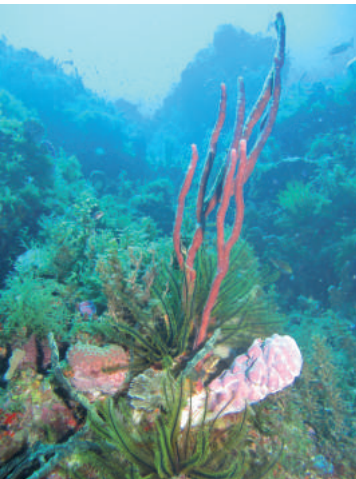

***Aplysina fulva***  
yellow to ochre branches, conules 0.5 mm

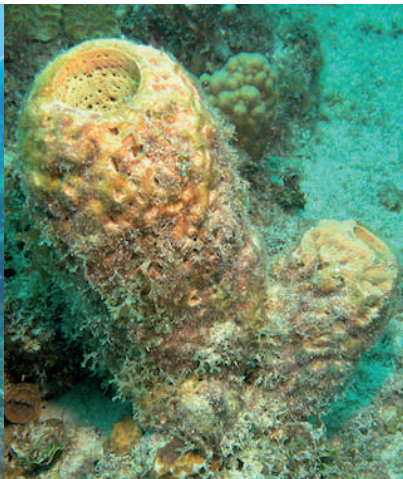

***Aplysina lacunosa***  
yellow-brown tubes, with strongly grooved surface, groves up to 1 cm wide

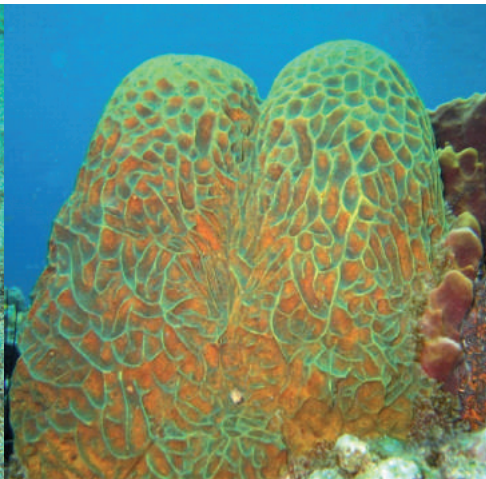

***Verongula reiswigi***  
yellow green, tubes up to 30 cm high, ridged surface, soft consistency, oscular membrane

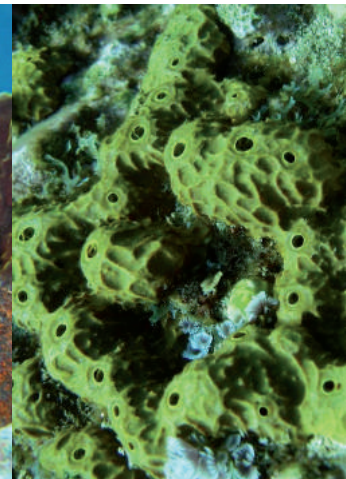

***Verongula rigida***  
yellow to brown lobes, "honey comb" surface, firm, oscules 0.5-1.5 cm wide, with membrane

### DEMOSPONGIAE Class

#### Biemnida Order

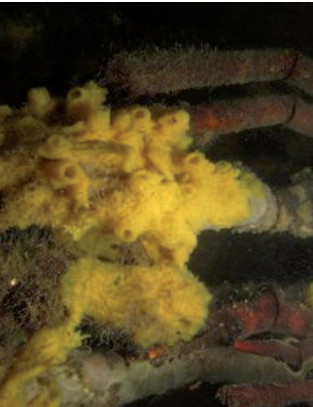

***Biemna caribea***  
massive crustose, yellow, soft,  
oscles 1-4 mm wide with membrane

#### Chondrillida Order

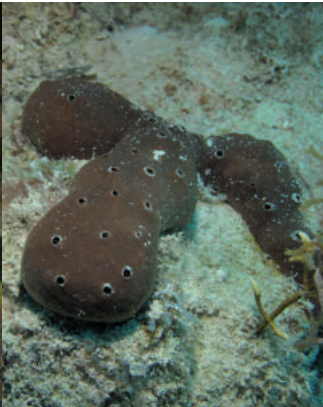

***Chondrilla caribensis***  
crust to massive, gray to dark brown,  
smooth, oscles 1-2 mm

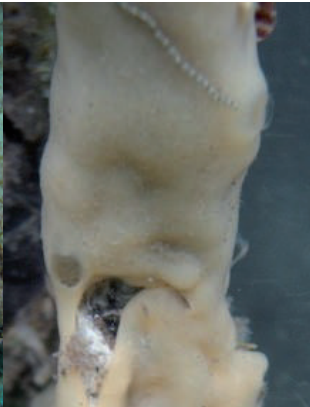

***Halisarca restigaensis***  
thin crust, cream-yellowish,  
slippery, oscles 1-2 mm

#### Dendroceratida Order

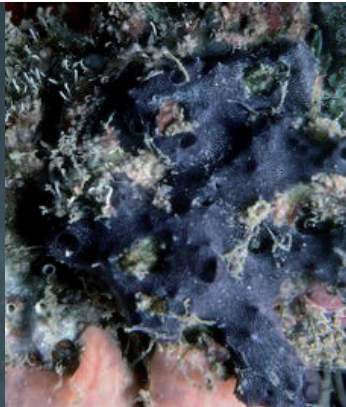

***Chelonaplysilla aff. erecta***  
spiky, very soft, black, conules 3-5 mm

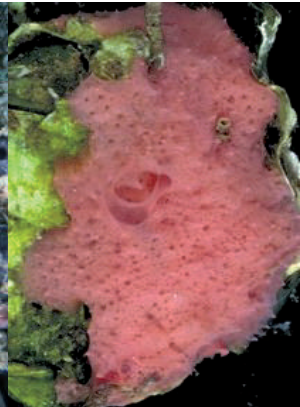

***Darwinella rosacea***  
thin crust and porous, pink or rose,  
soft, conules 0.5 mm

#### Dictyoceratida Order

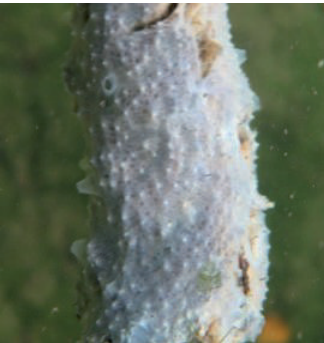

***Dysidea etheria***  
crust or massive, soft, blue pink,  
conules 1 mm high, 2-4 mm apart

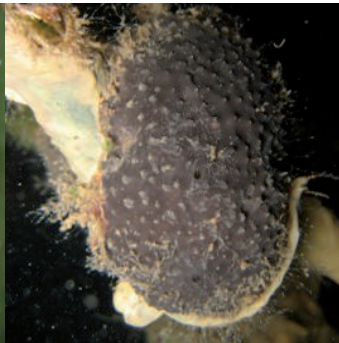

***Hyrtilos proteus***  
massive, compressible, black out and  
brown in, conules > 1 mm

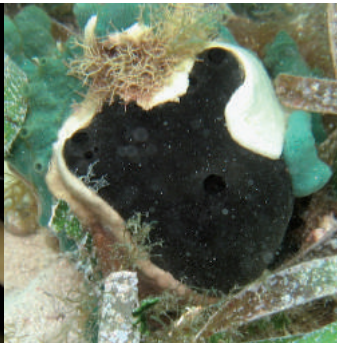

***Spongia pertusa***  
massive, compressible and visually smooth,  
black out and brown in, conules < 5 mm

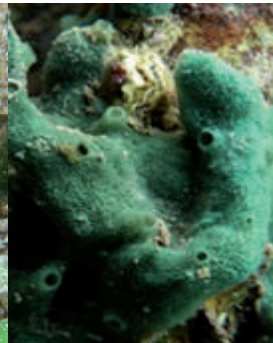

***Amphimedon erina***  
crust to lobate, firm, oscles 2-4 mm

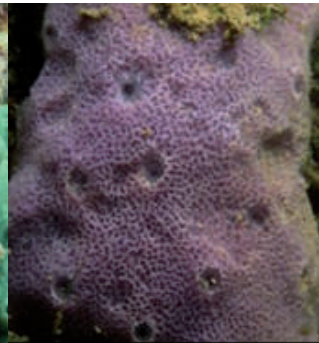

***Callyspongia pallida***  
crust and porous, firm, violet to brown,  
oscles 2-4 mm with white membrane

#### Haplosclerida Order

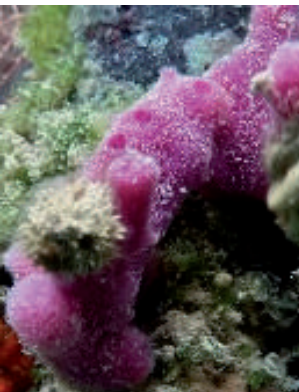

***Chalinula molitba***  
cushions to ramose, flimsy,  
oscles 1-7 mm

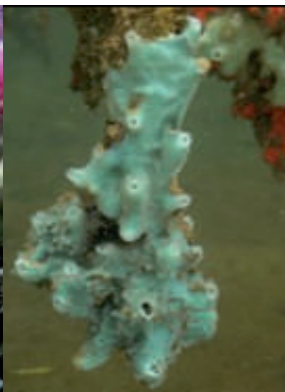

***Haliclona caerulea***  
crusts cushions or digitate, bluish,  
firm, oscles 1-8 mm

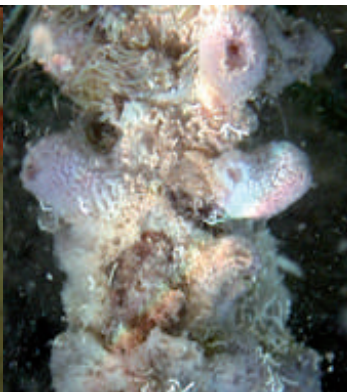

***Haliclona curacaoensis***  
crust to cushions, gray to whitish, rugose  
compressible sticky mucous, oscles 5-15 mm

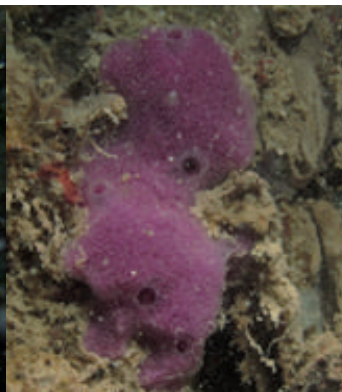

***Haliclona implexiformis***  
crust to cushions, rose to violet,  
compressible, oscles 4-10 mm

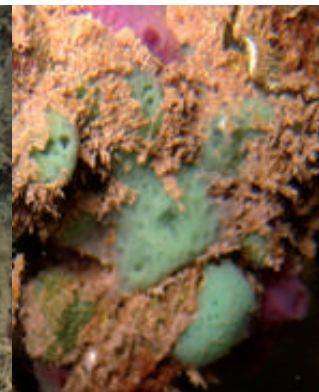

***Haliclona manglaris***  
thin crust to cushions, soft, oscles 1-3 mm

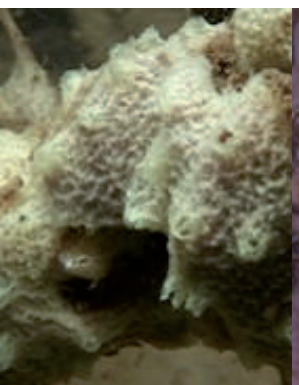

***Haliclona cf. piscaderaensis***  
crust, friable, grayish white,  
oscles 2-3 mm

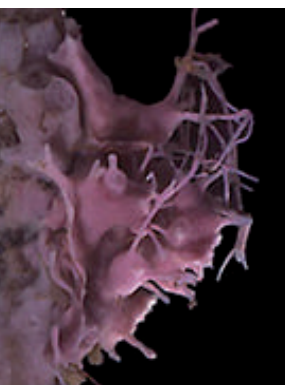

***Haliclona tubifera***  
crust to cushion, pink to violet,  
firm, with filaments

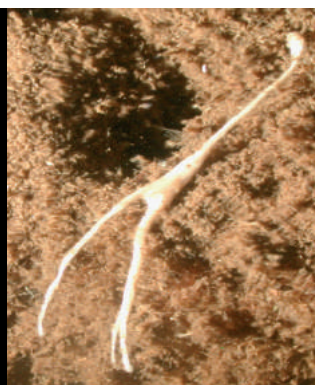

***Haliclona twincayensis***  
dichotomous thin (1-3 mm)  
branches, oscles < 1 mm

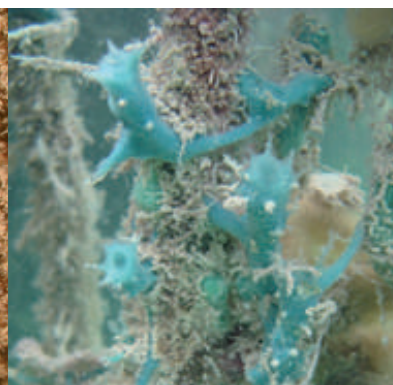

***Haliclona vermeuleni***  
tubes with spiky extensions, turquoise  
to gray, firm, oscles 1-3 mm

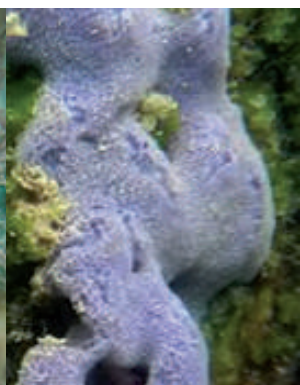

***Niphates caycedoi***  
crust, violet to pink, firm, oscles 4-8 mm

### Poecilosclerida Order

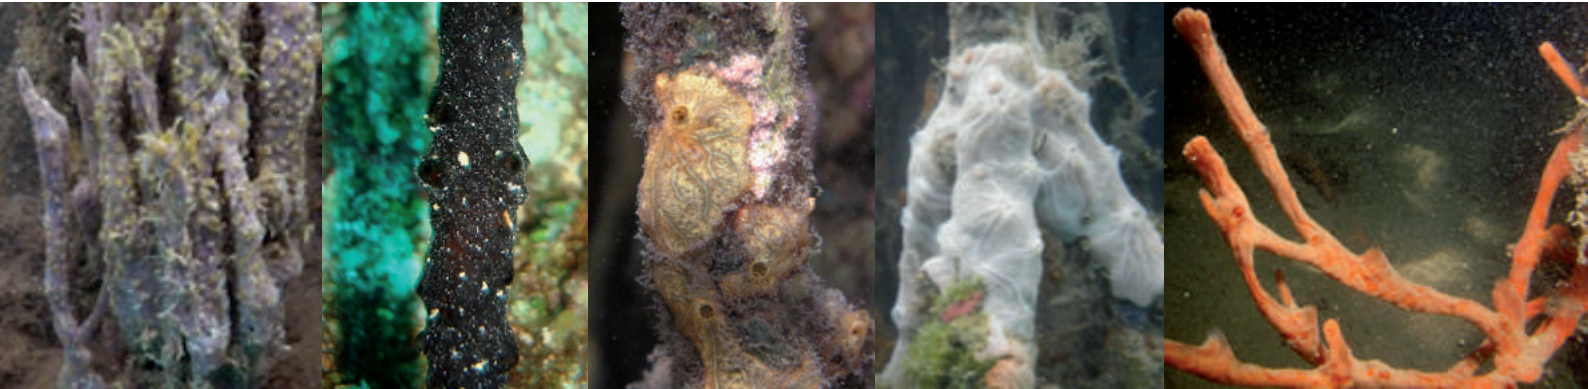

***Niphates erecta***  
massive to ramose, rose to gray, hispid surface, oscules 3-7 mm

***Artemisina melana***  
crustose, dark brown out and orange in, soft, oscules 5-10 mm

***Clathria curacaoensis***  
crust to ramose, orange to red with yellow tinges, oscules 4-10 mm and can be as small as 1 mm

***Clathria venosa***  
thin crust, gray to cream, oscules 2-4 mm, with radial canals

***Desmapsamma anchorata***  
lobate to ramose, pink-red to orange, oscules 1-5 mm with membrane

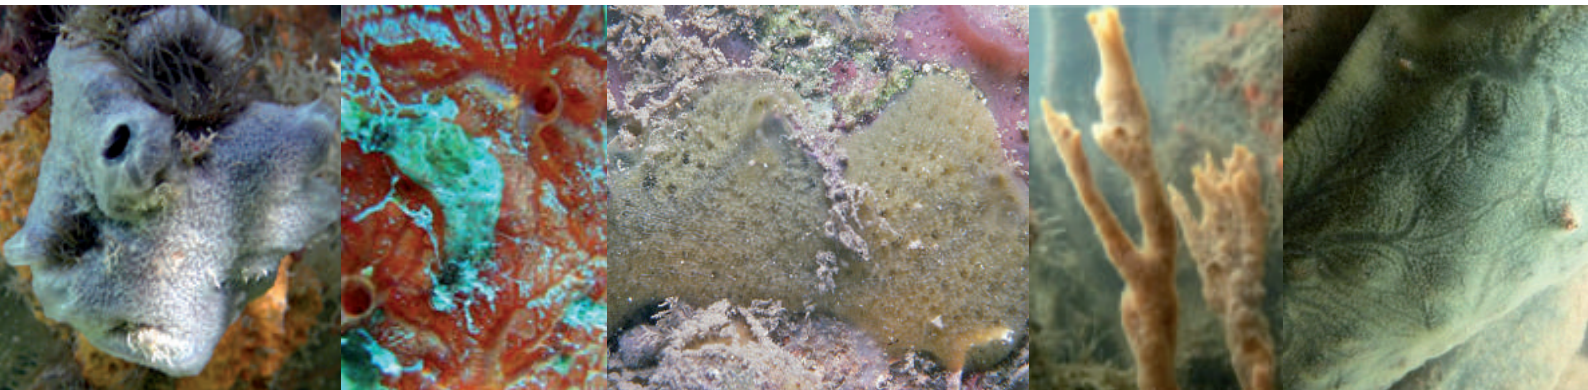

***Lissodendoryx isodictyalis***  
massive to lobate, pale gray green violet, oscules 4-10 mm, with membrane and one side canal

***Monanchora arbuscula***  
crust to ramose, red with transparent membrane, oscules 3-20 mm

***Mycale americana***  
crust 0.5-20 mm, yellow to orange, mucose, oscules 3-10 mm

***Mycale angulosa***  
crustose to ramose, bluish orange cream, oscules 1-10 mm

***Mycale carmigropila***  
thin to thick crust, light green to bluish, oscules 2-10 mm, with canals

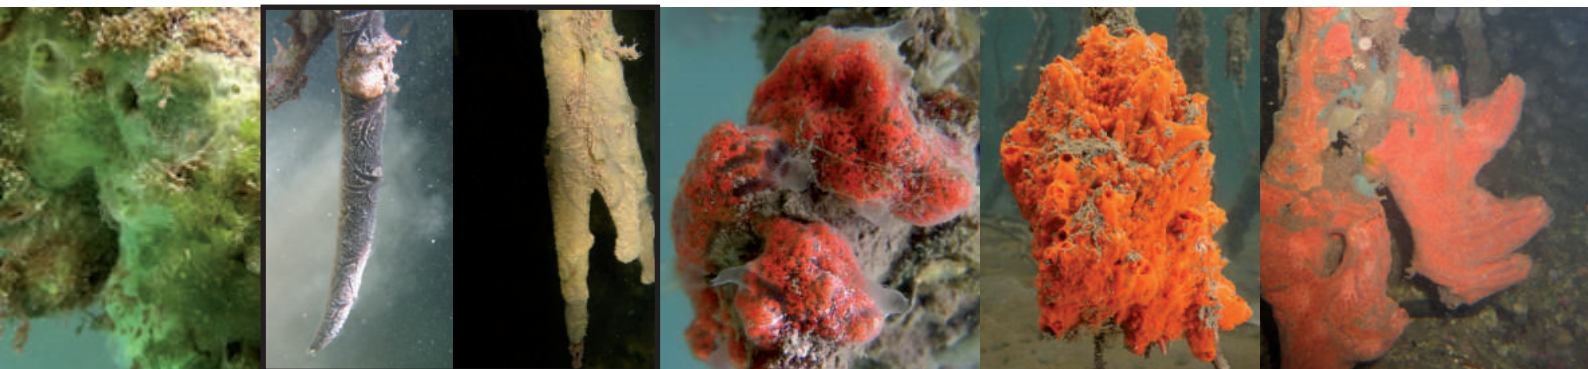

***Mycale citrina***  
small crust, lemon yellow, oscules 1-3 mm

***Mycale magnirhaphidifera***  
thin crust, purple yellow to bluish, oscules 1-3 mm

***Mycale microsigmatosa***  
crustose thin to thick, red orange gray, bright red dots, oscules 3-5 mm

***Tedania ignis-fire sponge***  
massive amorphous, red-orange, oscules 0.5-3 cm

***Tedania klausii***  
massive lobated, red-orange white tinges, oscules 1-3 cm

### Scopalinida Order

### Suberitida Order

### Tetractinellida Order

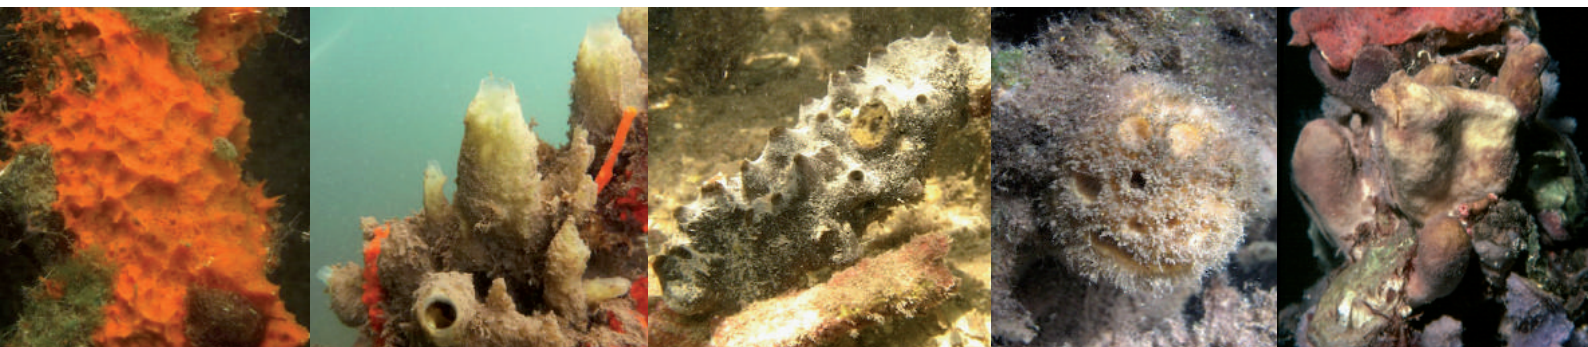

***Scopalina ruetzleri***  
bright to drab orange, soft, conulose, oscules 2-6 mm

***Halichondria magniconulosa***  
massive, yellowish, rugose, oscules projections 5-10 mm wide

***Halichondria melanadocia***  
dark grey to black out and orange in, oscules 5-10 mm

***Cinachyrella apion***  
round, yellowish, porocalices up to 3 mm

***Geodia papyracea***  
massive brown, oscules 2-5 mm, aggregated on plates
